# Supplementary material for: A prognostic model based on DNA methylation-related gene expression for predicting overall survival in hepatocellular carcinoma
Source: Front Oncol. 2024 Jan 18;13:1171932. doi: 10.3389/fonc.2023.1171932 (PMC10830715; doi:10.3389/fonc.2023.1171932)
Supplement: Supplementary file 4 [file Table_4.xlsx]

## Sheet: Sheet1
ID	Description	setSize	enrichmentScore	NES	pvalue	p.adjust	qvalues	rank	leading_edge	core_enrichment
KEGG_COMPLEMENT_AND_COAGULATION_CASCADES	KEGG_COMPLEMENT_AND_COAGULATION_CASCADES	68	-0.657893	-3.13834	1e-10	4.09361e-09	3.38747e-09	1911	tags=59%, list=10%, signal=53%	SERPINF2/CD55/PROS1/CR2/C4BPB/C3/C4B/F5/C8G/CFB/F8/C4A/MASP1/KNG1/THBD/CFH/CFI/F13B/F12/F11/CPB2/C8B/KLKB1/MASP2/C1R/C1S/PLG/SERPING1/VWF/FGA/FGG/FGB/SERPINC1/C4BPA/MBL2/C6/F9/C8A/C7/C9
KEGG_FATTY_ACID_METABOLISM	KEGG_FATTY_ACID_METABOLISM	40	-0.778966	-3.17416	1e-10	4.09361e-09	3.38747e-09	1948	tags=80%, list=10%, signal=72%	ECI1/ACADS/ACADVL/ALDH3A2/ALDH9A1/ACADSB/ECI2/ALDH7A1/CPT1A/ACOX1/ALDH1B1/ACSL5/ACADM/ECHS1/CPT2/ACAA1/ACAA2/ACSL6/HADH/GCDH/ADH1A/ACSL1/ACAT1/ALDH2/CYP4A11/ADH6/EHHADH/CYP4A22/ADH1C/ACADL/ADH1B/ADH4
KEGG_RETINOL_METABOLISM	KEGG_RETINOL_METABOLISM	55	-0.680844	-3.11798	1e-10	4.09361e-09	3.38747e-09	681	tags=45%, list=4%, signal=44%	UGT2B15/ADH1A/CYP4A11/ADH6/RDH5/CYP2A6/CYP4A22/CYP2C8/CYP3A43/ADH1C/CYP2C9/UGT2B10/UGT2B7/ADH1B/UGT1A4/RDH16/CYP2A7/CYP2A13/CYP2B6/UGT1A3/ADH4/CYP26A1/CYP3A4/CYP1A1/CYP1A2
KEGG_TRYPTOPHAN_METABOLISM	KEGG_TRYPTOPHAN_METABOLISM	36	-0.746431	-3.01086	1e-10	4.09361e-09	3.38747e-09	1717	tags=64%, list=9%, signal=58%	ALDH9A1/ALDH7A1/MAOB/TDO2/ALDH1B1/ECHS1/ACMSD/CAT/HADH/KMO/HAAO/GCDH/ACAT1/ALDH2/OGDHL/EHHADH/AADAT/INMT/AOX1/CYP1B1/IDO2/CYP1A1/CYP1A2
KEGG_DRUG_METABOLISM_CYTOCHROME_P450	KEGG_DRUG_METABOLISM_CYTOCHROME_P450	63	-0.609391	-2.91032	1.38221e-10	4.09361e-09	3.38747e-09	786	tags=44%, list=4%, signal=43%	FMO4/UGT2B15/ADH1A/ADH6/GSTZ1/FMO3/CYP2A6/CYP2C8/CYP2E1/CYP3A43/ADH1C/CYP2C9/FMO2/UGT2B10/AOX1/UGT2B7/ADH1B/UGT1A4/CYP2A7/CYP2A13/CYP2B6/UGT1A3/ALDH3A1/ADH4/GSTM5/GSTM1/CYP3A4/CYP1A2
KEGG_PRIMARY_BILE_ACID_BIOSYNTHESIS	KEGG_PRIMARY_BILE_ACID_BIOSYNTHESIS	15	-0.900529	-3.09524	1.41975e-10	4.09361e-09	3.38747e-09	1631	tags=93%, list=9%, signal=85%	AKR1C4/ACOX2/CYP27A1/AMACR/CYP7A1/HSD17B4/CYP7B1/BAAT/SCP2/CH25H/CYP39A1/AKR1D1/SLC27A5/CYP8B1
KEGG_METABOLISM_OF_XENOBIOTICS_BY_CYTOCHROME_P450	KEGG_METABOLISM_OF_XENOBIOTICS_BY_CYTOCHROME_P450	60	-0.561281	-2.63194	4.20076e-08	9.92519e-07	8.21312e-07	681	tags=50%, list=4%, signal=48%	CYP2C18/AKR1C4/GSTA2/MGST1/EPHX1/ALDH1A3/UGT1A1/UGT2B15/ADH1A/ADH6/GSTZ1/CYP2C8/CYP2E1/CYP3A43/ADH1C/CYP2C9/UGT2B10/UGT2B7/ADH1B/UGT1A4/CYP1B1/CYP2B6/UGT1A3/ALDH3A1/ADH4/GSTM5/GSTM1/CYP3A4/CYP1A1/CYP1A2
KEGG_VALINE_LEUCINE_AND_ISOLEUCINE_DEGRADATION	KEGG_VALINE_LEUCINE_AND_ISOLEUCINE_DEGRADATION	43	-0.62348	-2.63071	4.58968e-08	9.92519e-07	8.21312e-07	2229	tags=65%, list=12%, signal=57%	ALDH3A2/DBT/ALDH9A1/MCCC2/ACADSB/HIBCH/HSD17B10/ALDH7A1/MCEE/MMUT/HMGCS2/PCCB/ALDH1B1/ACADM/ECHS1/IVD/BCKDHB/HMGCL/ACAA1/ACAA2/HADH/HIBADH/ACAT1/ABAT/ALDH2/ALDH6A1/EHHADH/AOX1
KEGG_GLYCINE_SERINE_AND_THREONINE_METABOLISM	KEGG_GLYCINE_SERINE_AND_THREONINE_METABOLISM	29	-0.679916	-2.61396	1.4269e-07	2.74283e-06	2.2697e-06	2494	tags=72%, list=13%, signal=63%	GCAT/MAOA/GLYCTK/GAMT/SRR/AOC3/MAOB/SHMT1/CBS/AGXT/GATM/PIPOX/SARDH/DAO/BHMT/AGXT2/GNMT/ALAS1/DMGDH/SDS/CTH
KEGG_PEROXISOME	KEGG_PEROXISOME	77	-0.495113	-2.54896	1.87307e-07	3.24041e-06	2.68144e-06	1815	tags=40%, list=10%, signal=36%	DECR2/GSTK1/SOD2/ECI2/CRAT/PXMP2/SOD1/XDH/ACOX1/AGXT/ACSL5/ACOX2/PIPOX/HMGCL/ACAA1/AMACR/EPHX2/MLYCD/CAT/ACSL6/HSD17B4/DAO/BAAT/SCP2/PEX11G/ACSL1/HAO1/SLC27A2/NOS2/HAO2/EHHADH
KEGG_STEROID_HORMONE_BIOSYNTHESIS	KEGG_STEROID_HORMONE_BIOSYNTHESIS	48	-0.547313	-2.357	2.52923e-06	3.97779e-05	3.29163e-05	1238	tags=42%, list=7%, signal=39%	UGT1A1/SRD5A1/HSD17B8/CYP7A1/CYP7B1/UGT2B15/CYP11A1/HSD17B6/CYP3A43/UGT2B10/UGT2B7/UGT1A4/AKR1D1/CYP1B1/SRD5A2/HSD11B1/UGT1A3/CYP3A4/CYP1A1/CYP11B2
KEGG_LINOLEIC_ACID_METABOLISM	KEGG_LINOLEIC_ACID_METABOLISM	20	-0.700066	-2.52804	1.73292e-05	0.000239498	0.000198185	1680	tags=55%, list=9%, signal=50%	PLA2G5/CYP2C18/CYP2J2/PLA2G2A/PLA2G2D/CYP2C8/CYP2E1/CYP3A43/CYP2C9/CYP3A4/CYP1A2
KEGG_PROPANOATE_METABOLISM	KEGG_PROPANOATE_METABOLISM	31	-0.599157	-2.35239	1.7997e-05	0.000239498	0.000198185	1948	tags=68%, list=10%, signal=61%	ACACB/LDHC/ALDH3A2/ALDH9A1/SUCLG2/HIBCH/SUCLG2P2/ALDH7A1/MCEE/MMUT/PCCB/ALDH1B1/ACADM/ECHS1/MLYCD/ACSS3/ACAT1/ABAT/ALDH2/ALDH6A1/EHHADH
KEGG_BETA_ALANINE_METABOLISM	KEGG_BETA_ALANINE_METABOLISM	20	-0.695779	-2.51256	2.28377e-05	0.000282209	0.000233528	2229	tags=75%, list=12%, signal=66%	ALDH3A2/AOC3/ALDH9A1/HIBCH/ALDH7A1/UPB1/ALDH1B1/ACADM/ECHS1/MLYCD/DPYS/ABAT/ALDH2/EHHADH/CNDP1
KEGG_BUTANOATE_METABOLISM	KEGG_BUTANOATE_METABOLISM	30	-0.588289	-2.29257	3.55426e-05	0.000409925	0.000339214	1948	tags=57%, list=10%, signal=51%	ALDH3A2/ALDH9A1/ALDH7A1/HMGCS2/ALDH1B1/BDH1/ALDH5A1/ECHS1/HMGCL/HADH/ACSM3/ACAT1/ABAT/ALDH2/EHHADH/ACSM2A/ACSM5
KEGG_CELL_CYCLE	KEGG_CELL_CYCLE	119	0.500254	1.72905	4.40255e-05	0.000476026	0.000393912	3321	tags=43%, list=18%, signal=35%	CDKN1C/TTK/PLK1/BUB1B/CDC20/CDK1/SMC1B/CCNB2/BUB1/CCNB1/CDC6/PTTG1/CDC25A/TGFB2/ORC6/CDC25C/SFN/CHEK1/CCNE1/MCM2/ESPL1/ORC1/TGFB1/E2F2/CDC45/CCNE2/RBL1/MAD2L1/MCM6/PKMYT1/MCM4/CDC7/SKP2/CDC25B/DBF4/E2F1/MCM3/TFDP1/MCM5/E2F3/E2F5/CDK4/CDKN2A/HDAC2/CDK2/YWHAZ/PCNA/YWHAQ/CDKN2C/ANAPC7/MCM7
KEGG_DRUG_METABOLISM_OTHER_ENZYMES	KEGG_DRUG_METABOLISM_OTHER_ENZYMES	47	-0.492227	-2.11184	7.8785e-05	0.000801753	0.000663453	1398	tags=38%, list=8%, signal=36%	XDH/UGT1A1/CES1/UGT2B15/DPYS/CES2/UPP2/CYP2A6/CES5A/CYP3A43/UGT2B10/UGT2B7/UGT1A4/CYP2A7/CYP2A13/UGT1A3/NAT2/CYP3A4
KEGG_ECM_RECEPTOR_INTERACTION	KEGG_ECM_RECEPTOR_INTERACTION	73	0.521979	1.71701	0.000401506	0.00385892	0.00319326	3162	tags=33%, list=17%, signal=27%	IBSP/COL2A1/LAMA1/LAMC2/ITGB6/ITGB8/ITGB4/ITGA3/SV2A/COL11A2/TNC/HMMR/SPP1/LAMB1/ITGA2/ITGAV/AGRN/ITGA5/LAMA5/COL5A2/COL6A3/LAMC1/COMP/COL1A2
KEGG_TYROSINE_METABOLISM	KEGG_TYROSINE_METABOLISM	36	-0.483106	-1.9487	0.000498478	0.00453878	0.00375585	1406	tags=44%, list=8%, signal=41%	MAOB/GOT1/ALDH1A3/GOT2/DBH/HGD/ADH1A/ADH6/GSTZ1/ADH1C/AOX1/ADH1B/TAT/HPD/ALDH3A1/ADH4
KEGG_PPAR_SIGNALING_PATHWAY	KEGG_PPAR_SIGNALING_PATHWAY	62	-0.408039	-1.92104	0.00140549	0.0119705	0.00990564	1514	tags=48%, list=8%, signal=45%	CPT1A/HMGCS2/ACOX1/ACSL5/ANGPTL4/ACOX2/ACADM/PLIN1/CPT2/CYP27A1/ACAA1/CYP7A1/APOC3/ACSL6/OLR1/SCP2/ACSL1/LPL/SLC27A2/PCK2/CYP4A11/EHHADH/APOA5/CYP4A22/PCK1/ACADL/SLC27A5/CYP8B1/RXRG/FABP4
KEGG_ARGININE_AND_PROLINE_METABOLISM	KEGG_ARGININE_AND_PROLINE_METABOLISM	50	-0.413509	-1.81708	0.00145307	0.0119705	0.00990564	2473	tags=64%, list=13%, signal=56%	AGMAT/P4HA1/NOS3/MAOA/ALDH3A2/GAMT/ALDH9A1/PRODH2/ALDH7A1/CKMT2/MAOB/SAT1/ASL/GOT1/ALDH1B1/GATM/LAP3/ARG1/NAGS/ARG2/GOT2/PRODH/ALDH4A1/DAO/CPS1/ASS1/ALDH2/NOS2/GLUL/OTC/OAT/GLS2
KEGG_ALANINE_ASPARTATE_AND_GLUTAMATE_METABOLISM	KEGG_ALANINE_ASPARTATE_AND_GLUTAMATE_METABOLISM	29	-0.472829	-1.81781	0.00295275	0.0232194	0.0192141	1504	tags=55%, list=8%, signal=51%	ACY3/ASL/GOT1/AGXT/ASPA/ALDH5A1/GOT2/ALDH4A1/CPS1/GPT/ASS1/ABAT/GLUL/GPT2/AGXT2/GLS2
KEGG_HYPERTROPHIC_CARDIOMYOPATHY_HCM	KEGG_HYPERTROPHIC_CARDIOMYOPATHY_HCM	58	0.501558	1.61459	0.0049545	0.0372665	0.0308381	2725	tags=33%, list=15%, signal=28%	ITGB6/TNNC1/ITGB8/ITGB4/DES/ITGA3/CACNG4/TGFB2/MYL3/CACNB3/TGFB1/CACNA1D/ITGA2/TPM4/ITGAV/ITGA5/TNF/CACNA2D4/PRKAA2
KEGG_DNA_REPLICATION	KEGG_DNA_REPLICATION	34	0.550152	1.61839	0.00714286	0.0514881	0.0426065	5392	tags=68%, list=29%, signal=48%	MCM2/MCM6/DNA2/MCM4/RFC4/MCM3/MCM5/FEN1/POLE2/POLD1/LIG1/PRIM1/POLA1/PCNA/RFC5/PRIM2/MCM7/POLD3/POLA2/RFC3/RFC2/RPA1/RFC1
KEGG_HISTIDINE_METABOLISM	KEGG_HISTIDINE_METABOLISM	29	-0.420904	-1.61818	0.0102827	0.0711566	0.0588822	1948	tags=48%, list=10%, signal=43%	ALDH9A1/ALDH7A1/MAOB/ACY3/ALDH1B1/ALDH1A3/ASPA/FTCD/AMDHD1/ALDH2/HDC/UROC1/ALDH3A1/CNDP1
KEGG_NEUROACTIVE_LIGAND_RECEPTOR_INTERACTION	KEGG_NEUROACTIVE_LIGAND_RECEPTOR_INTERACTION	125	0.41184	1.4285	0.0117117	0.0779278	0.0644855	1480	tags=21%, list=8%, signal=19%	GPR50/CHRNA1/SCTR/GLP1R/KISS1R/MTNR1B/OXTR/SSTR5/GABRA3/LPAR3/DRD4/LPAR2/ADORA2B/TACR1/ADORA1/HTR1D/GABRB3/GRM8/GPR35/GRIN2D/GABBR1/SSTR2/ADRA2C/PTGFR/NPFFR2/BDKRB1
KEGG_GLYCOSPHINGOLIPID_BIOSYNTHESIS_LACTO_AND_NEOLACTO_SERIES	KEGG_GLYCOSPHINGOLIPID_BIOSYNTHESIS_LACTO_AND_NEOLACTO_SERIES	17	0.617253	1.61322	0.0170903	0.106383	0.0880325	2140	tags=41%, list=11%, signal=36%	FUT3/B3GALT2/B3GNT3/FUT2/FUT4/FUT1/B3GNT5
KEGG_RENIN_ANGIOTENSIN_SYSTEM	KEGG_RENIN_ANGIOTENSIN_SYSTEM	15	-0.532616	-1.83068	0.0172181	0.106383	0.0880325	714	tags=27%, list=4%, signal=26%	ENPEP/REN/MME/ACE2
KEGG_DILATED_CARDIOMYOPATHY	KEGG_DILATED_CARDIOMYOPATHY	63	0.462423	1.5027	0.0247945	0.147912	0.122398	2426	tags=30%, list=13%, signal=26%	ITGB6/TNNC1/ITGB8/ITGB4/DES/ITGA3/CACNG4/TGFB2/MYL3/CACNB3/PRKX/TGFB1/CACNA1D/ITGA2/TPM4/ITGAV/ITGA5/TNF/CACNA2D4
KEGG_PROTEASOME	KEGG_PROTEASOME	41	-0.340397	-1.42383	0.0311981	0.175678	0.145374	10493	tags=95%, list=56%, signal=42%	PSMA1/PSMD11/PSMD13/PSMD2/PSMC4/PSMA6/PSMC5/PSMA4/PSMD1/PSMB3/PSME4/PSMD4/PSMB5/PSMB1/PSMD6/PSMD3/PSMB4/PSMD8/PSMF1/PSMA5/PSMC6/IFNG/PSMC3/PSMD12/PSMB9/PSMB2/SEM1/PSMA3/PSMB6/PSMA7/POMP/PSME2/PSME1/PSMB7/PSMC1/PSMD7/PSMC2/PSMB8/PSMB10
KEGG_CITRATE_CYCLE_TCA_CYCLE	KEGG_CITRATE_CYCLE_TCA_CYCLE	30	-0.403321	-1.57175	0.0314799	0.175678	0.145374	1930	tags=30%, list=10%, signal=27%	SDHB/FH/SUCLG2/SUCLG2P2/ACO1/PC/PCK2/OGDHL/PCK1
KEGG_ARACHIDONIC_ACID_METABOLISM	KEGG_ARACHIDONIC_ACID_METABOLISM	46	-0.339907	-1.44792	0.0385783	0.208564	0.172587	1680	tags=41%, list=9%, signal=38%	PTGS2/PLA2G5/CYP2C18/CYP2U1/PTGIS/CYP2J2/CYP4F3/CBR1/GGT5/EPHX2/PLA2G2A/PLA2G2D/CYP4A11/CYP4F2/CYP4A22/CYP2C8/CYP2E1/CYP2C9/CYP2B6
KEGG_LYSINE_DEGRADATION	KEGG_LYSINE_DEGRADATION	44	-0.328455	-1.37667	0.0407827	0.2138	0.17692	1354	tags=27%, list=7%, signal=25%	ALDH1B1/ECHS1/PIPOX/HADH/GCDH/ACAT1/ALDH2/OGDHL/EHHADH/AADAT/BBOX1/AASS
KEGG_MATURITY_ONSET_DIABETES_OF_THE_YOUNG	KEGG_MATURITY_ONSET_DIABETES_OF_THE_YOUNG	18	0.572066	1.51	0.0440476	0.224125	0.185464	1046	tags=22%, list=6%, signal=21%	IAPP/MNX1/PDX1/HNF1B
KEGG_HOMOLOGOUS_RECOMBINATION	KEGG_HOMOLOGOUS_RECOMBINATION	25	0.531536	1.49046	0.0457666	0.226218	0.187196	5678	tags=60%, list=30%, signal=42%	XRCC2/RAD54L/EME1/BLM/RAD51/RAD54B/BRCA2/POLD1/RAD51D/XRCC3/POLD3/MRE11/RPA1/RAD52/RAD51C
KEGG_CYSTEINE_AND_METHIONINE_METABOLISM	KEGG_CYSTEINE_AND_METHIONINE_METABOLISM	31	-0.373578	-1.46673	0.0490603	0.233553	0.193265	1422	tags=32%, list=8%, signal=30%	CBS/GOT1/GOT2/ADI1/CDO1/BHMT/MAT1A/SDS/TAT/CTH
KEGG_PRION_DISEASES	KEGG_PRION_DISEASES	33	-0.347893	-1.38828	0.0499506	0.233553	0.193265	1587	tags=30%, list=9%, signal=28%	C8G/SOD1/EGR1/FYN/IL6/C8B/C6/C8A/C7/C9
