# Supplementary material for: A prognostic model based on DNA methylation-related gene expression for predicting overall survival in hepatocellular carcinoma
Source: Frontiers journal article supplement (doi:10.3389/fonc.2023.1171932), 2024-01-18
Supplement: Table_2.XLS [file Table_2.XLS]

## Sheet: 订单说明
常用的兼并碱基代码：
1	M=A,C
2	R=A,G
3	W=A,T
4	S=G,C
5	Y=C,T
6	K=G,T
7	V=A,G,C
8	H=A,C,T
9	D=A,G,T
10	B=G,C,T
11	N=A,G,C,T
注意事项：如客户未注明合成OD值，常规引物按2 OD合成，长链按1 OD合成，修饰引物按2 OD合成。
引物序列只填写ACGT，不要加其他字符，碱基数量自动计算。

## Sheet: 引物合成订单
ID	Primer	primer sequence(5'to3')	base number	method of purification	Total OD value
1	MEX3B-F	GGGCTTTGATCTGCATCACG	20
2	MEX3B-R	AGCTGTCGTTGCGATAGCTG	20
3			0
4			0
5	GLS-F	AGGGTCTGTTACCTAGCTTGG	21
6	GLS-R	ACGTTCGCAATCCTGTAGATTT	22
7			0
8			0
9	GNA14-F	GAGCGATGGACACGCTAAGG	20
10	GNA14-R	TCCTGTCGTAACACTCCTGGA	21
